# Supplementary material for: PI3K/mTOR is a therapeutically targetable genetic dependency in diffuse intrinsic pontine glioma
Source: PubMed Central journal article supplement (PMC10940093; doi:10.1172/jci170329), 2024-02-06

Fig. 5F

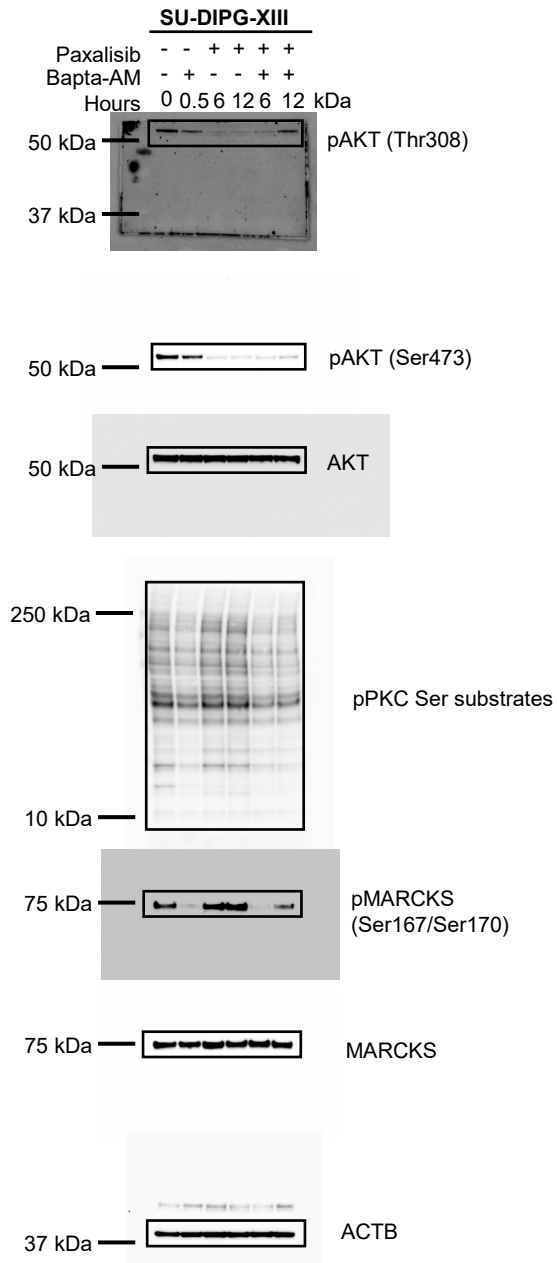

Full unedited blots for Figure 5

|             |   |   |   |   |     |
|-------------|---|---|---|---|-----|
| Paxalisib   | - | + | - | + | kDa |
| Enzastaurin | - | - | + | + |     |

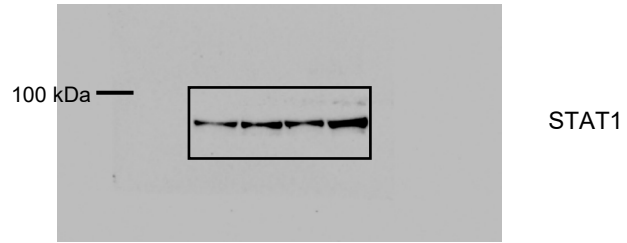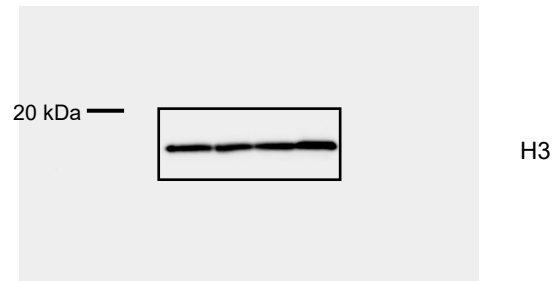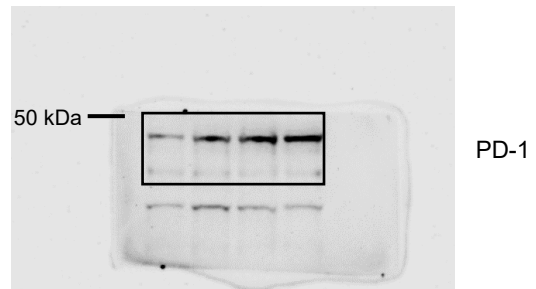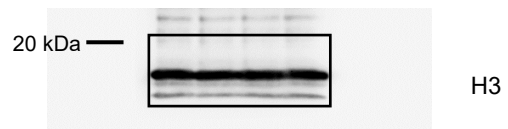

Full unedited blots for Figure S1

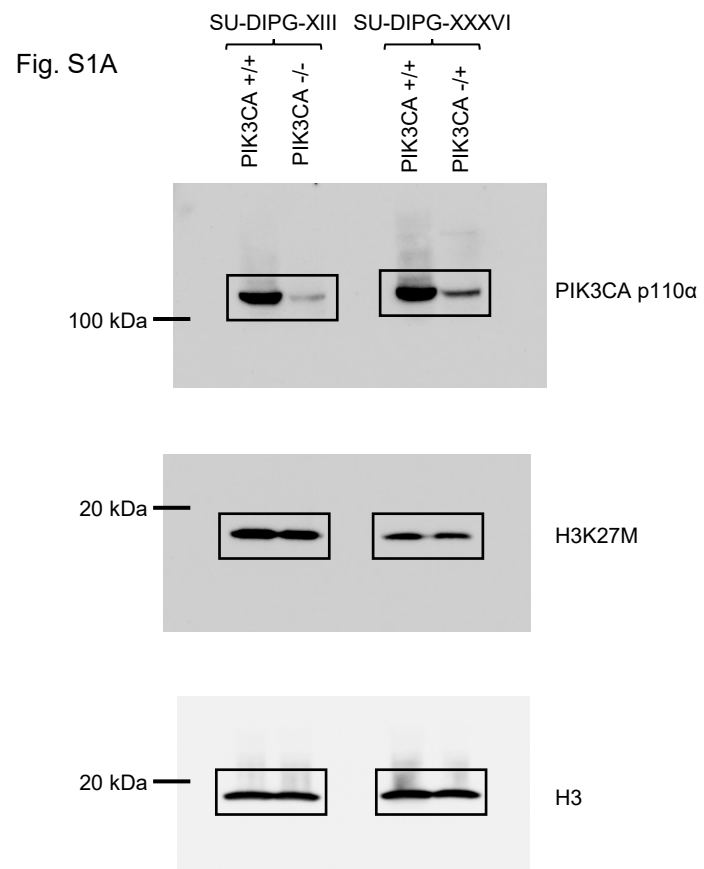

Fig. S1B

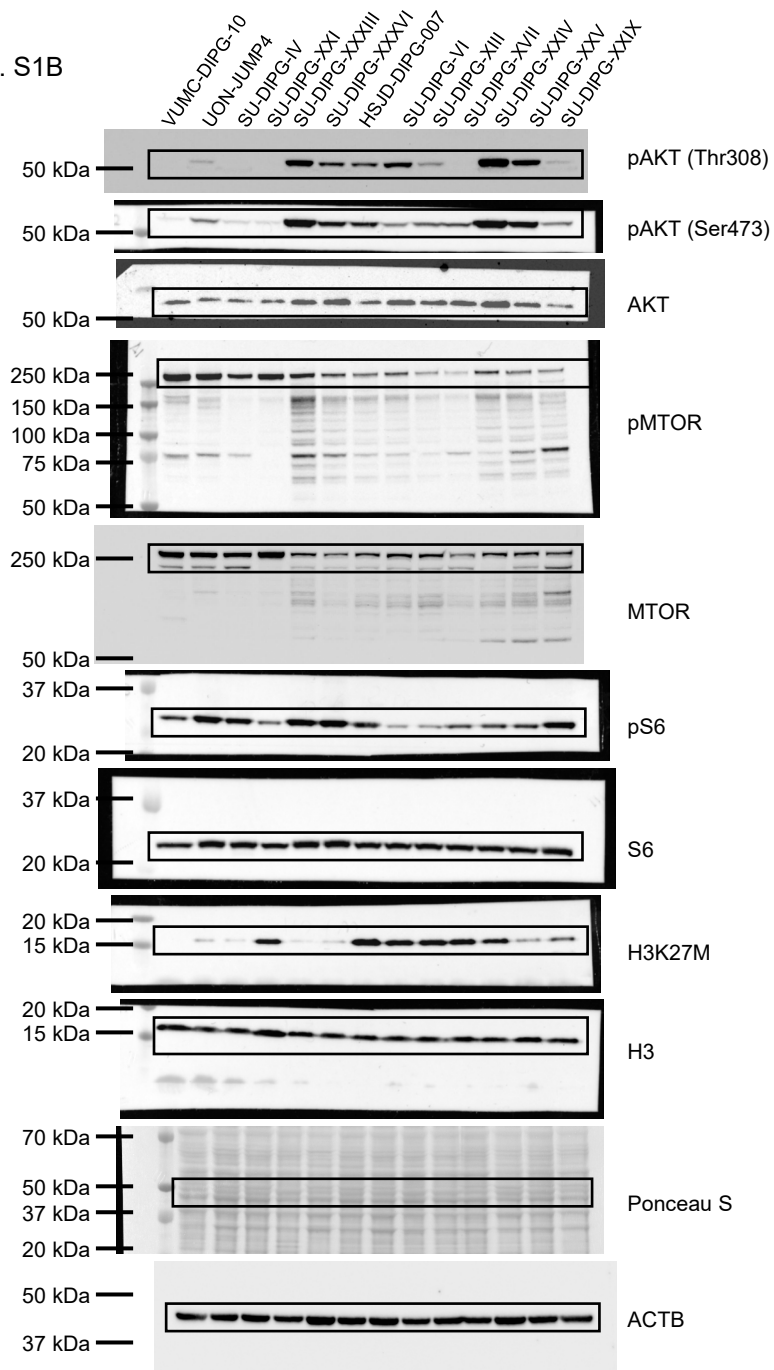

Fig. S1D

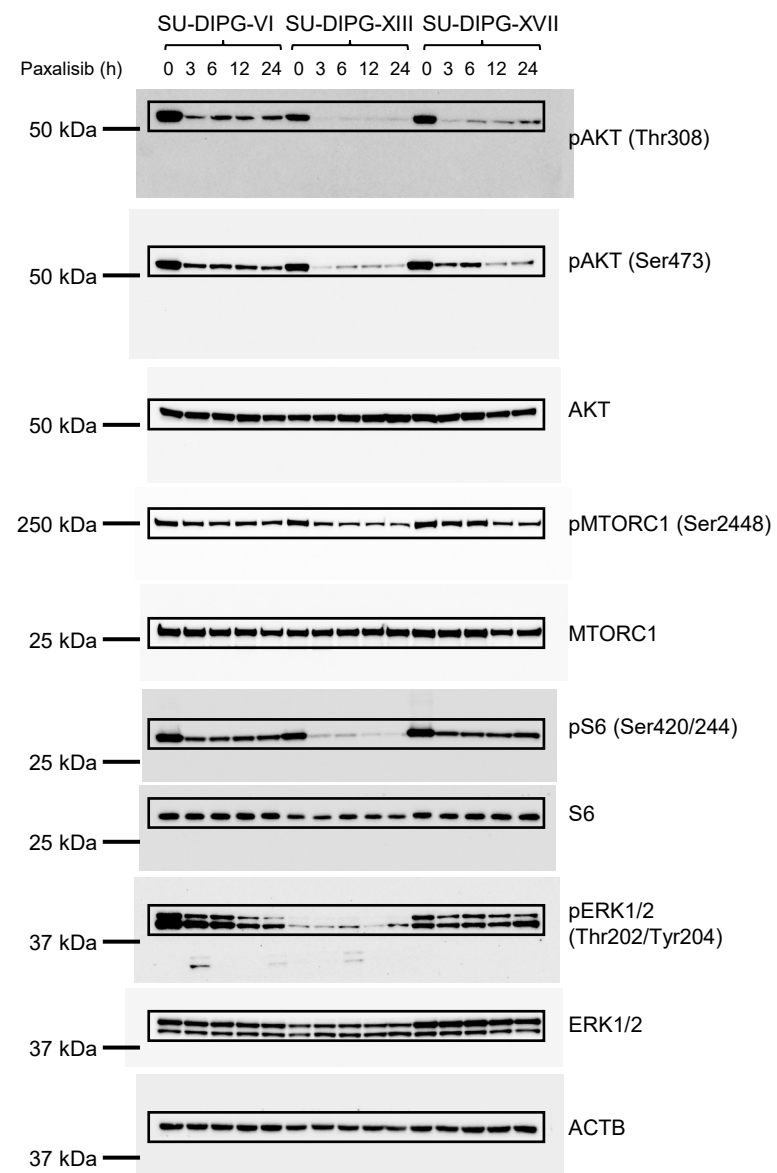



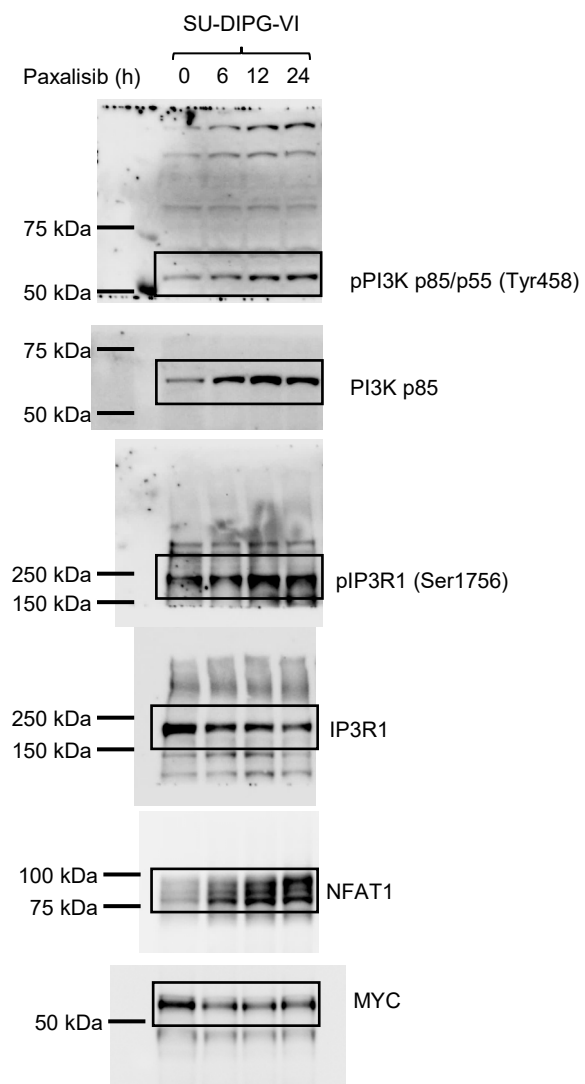

Full unedited blots for Figure S6  
SU-DIPG-XXXVI

SU-DIPG-XIII

SU-DIPG-XXXVI

SU-DIPG-XIII

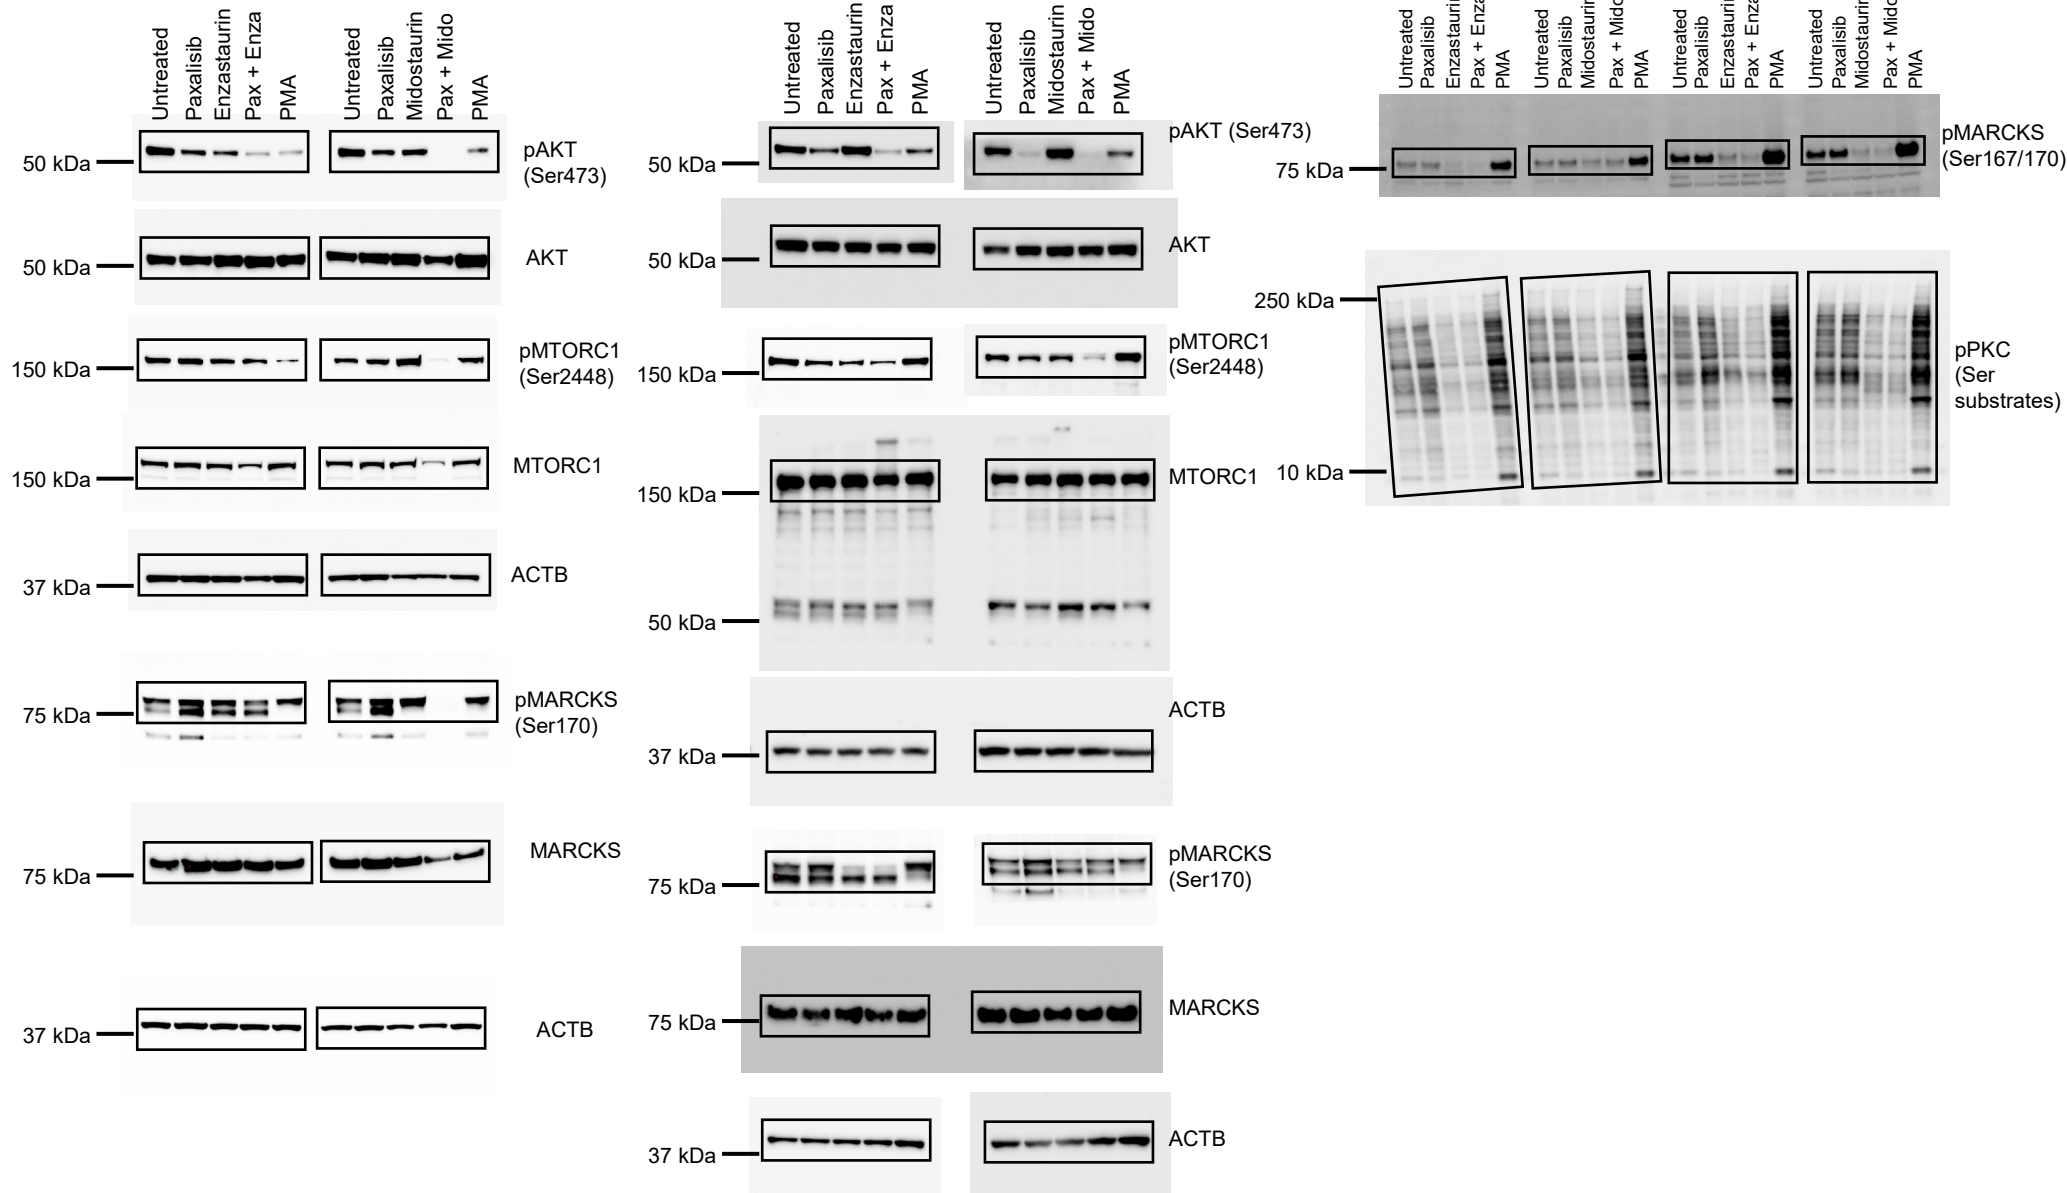

Supplement: jci-134-170329-s124.pdf [file jci-134-170329-s124.pdf]
